# Supplementary material for: Clinical spectrum of high-titre GAD65 antibodies
Source: HighWire-hosted journal article supplement (doi:10.1136/jnnp-2020-325275), 2021-02-09
Supplement: jnnp-2020-325275supp001_data_supplement.pdf [file jnnp-2020-325275supp001_data_supplement.pdf]

**Supplementary Table. Patients with high-titer GAD65 antibodies but a more likely diagnosis for their neurological presentation**

| Patient                                | Brief clinical description of neurological presentation                                                                                                                                                 | Concern raised for core or secondary manifestation of GAD65 neurological autoimmunity? | More likely alternative diagnosis                          | Sustained response to immunotherapy reported? | Systemic autoimmunity reported? <sup>1</sup>      | Serum anti-GAD65 titer (nmol/L) | CSF anti-GAD65 titer (nmol/L) |
|----------------------------------------|---------------------------------------------------------------------------------------------------------------------------------------------------------------------------------------------------------|----------------------------------------------------------------------------------------|------------------------------------------------------------|-----------------------------------------------|---------------------------------------------------|---------------------------------|-------------------------------|
| <i>Non-neuroinflammatory diagnoses</i> |                                                                                                                                                                                                         |                                                                                        |                                                            |                                               |                                                   |                                 |                               |
| 1                                      | Child with epilepsy and febrile seizures dating back to infancy; left mesial temporal sclerosis on MRI                                                                                                  | Yes (Epilepsy)                                                                         | Febrile seizures resulting in mesial temporal sclerosis    | No trial                                      | Yes, T1DM, thyroid disease, adrenal insufficiency | 2245                            | 8.34                          |
| 2                                      | Middle-aged adult with chronic pain and fatigue; normal tone and paraspinal tenderness on examination                                                                                                   | Yes (SPSD)                                                                             | Fibromyalgia                                               | No trial                                      | Yes, thyroid disease                              | 111                             | 0.33                          |
| 3                                      | Middle-aged adult with bilateral hand tingling and gait difficulties; gait ataxia on examination                                                                                                        | Yes (Cerebellar Ataxia)                                                                | Subacute combined degeneration due to B12 deficiency       | No trial                                      | Yes, thyroid disease, pernicious anemia           | 57.8                            | -                             |
| 4                                      | Middle-aged adult with acute-onset vertigo and imbalance, followed by vague sense of dizziness without objective neurological findings; peripheral vestibular dysfunction on initial vestibular testing | Yes (Cerebellar Ataxia/Brainstem Dysfunction)                                          | Vestibular neuritis followed by PPPD                       | No trial                                      | No                                                | 2136                            | -                             |
| 5                                      | Middle-aged adult with rapidly progressive behavioral change/cognitive decline and motor neuron disease; father had amyotrophic lateral sclerosis                                                       | Yes (Cognitive Impairment)                                                             | Frontotemporal dementia with amyotrophic lateral sclerosis | No trial                                      | No                                                | 3077                            | 20.9                          |
| 6                                      | Older adult with insidious short-term memory loss and temporal lobe-onset seizures; equivocal right hippocampal T2-hyperintensity/atrophy on MRI; decreased uptake in posterior cingulate on PET scan   | Yes (LE/Cognitive Impairment)                                                          | Alzheimer's disease                                        | No, trialed corticosteroids                   | Yes, thyroid disease, adrenal insufficiency       | 33.1                            | -                             |
| 7                                      | Older adult with more rapidly progressive ataxia after milder gait difficulties for several years and dysautonomia; cruciform                                                                           | Yes (Cerebellar Ataxia)                                                                | Multiple system atrophy-cerebellar type                    | No trial                                      | Yes, T1DM, thyroid disease                        | 614                             | 0.75                          |

|    |                                                                                                                                                                                              |                                     |                                                                  |                                                                                        |                              |      |      |
|----|----------------------------------------------------------------------------------------------------------------------------------------------------------------------------------------------|-------------------------------------|------------------------------------------------------------------|----------------------------------------------------------------------------------------|------------------------------|------|------|
|    | pontine T2-hyperintensity on MRI                                                                                                                                                             |                                     |                                                                  |                                                                                        |                              |      |      |
| 8  | Middle-aged adult with abnormal movements of face/shoulders elicited by swallowing; reported abdominal stiffness and pain in lower extremities                                               | Yes (SPSD)                          | Functional neurological disorder, diabetic peripheral neuropathy | No trial                                                                               | Yes, T1DM                    | 136  | -    |
| 9  | Young adult with headache, neck and back pain dating back to childhood/adolescence; some reported low back stiffness/spasms; multiple tender points on examination                           | Yes (SPSD)                          | Fibromyalgia                                                     | No, trialed IVIG and PLEX                                                              | No                           | 36.8 | -    |
| 10 | Middle-aged adult with low back pain/tightness, calf fasciculations and eyelid twitching; clinical diagnosis of anxiety                                                                      | Yes (SPSD)                          | Myofascial low back pain, Anxiety                                | No trial                                                                               | No                           | 869  | -    |
| 11 | Middle-aged adult with insidious executive dysfunction; epileptiform discharges on EEG, frontoparietal hypometabolism on PET scan; CSF biomarker profile consistent with Alzheimer's disease | Yes (Epilepsy/Cognitive Impairment) | Alzheimer's disease                                              | No trial                                                                               | Yes, pernicious anemia       | 334  | 1.86 |
| 12 | Middle-aged adult with insidious spastic paraparesis without sensory or bowel/bladder involvement; reported low back pain/spasms and left leg stiffness                                      | Yes (SPSD/Myelopathy)               | Primary lateral sclerosis                                        | No trial                                                                               | Yes, thyroid disease         | 248  | 0.31 |
| 13 | Adolescent with rapidly progressive spastic dysarthria/dysphagia after respiratory infection; pathogenic mutation in ATP1A3 gene                                                             | Yes (Brainstem Dysfunction)         | ATP1A3 gene-related neurological disease                         | Yes, improved with rituximab after failing corticosteroids, IVIG and PLEX <sup>2</sup> | No                           | 2680 | -    |
| 14 | Young adult with orthostatic lightheadedness, fatigue, abdominal bloating                                                                                                                    | No                                  | Postural orthostatic tachycardia syndrome                        | No trial                                                                               | No                           | 214  | -    |
| 15 | Young adult with insidious limb weakness, ptosis and dysphagia; muscle biopsy found evidence of a chronic and severe myopathy                                                                | No                                  | Inherited myopathy                                               | No, trialed IVIG, steroids and abatacept                                               | Yes, T1DM, pernicious anemia | 61.4 | -    |

|    |                                                                                                                                                                                           |                            |                                           |                             |                                                                                                           |      |      |
|----|-------------------------------------------------------------------------------------------------------------------------------------------------------------------------------------------|----------------------------|-------------------------------------------|-----------------------------|-----------------------------------------------------------------------------------------------------------|------|------|
| 16 | Young adult with two generalized tonic-clonic seizures in the setting of hyperglycemia                                                                                                    | Yes (Epilepsy)             | Provoked seizures due to hyperglycemia    | No trial                    | Yes, T1DM                                                                                                 | 24   | -    |
| 17 | Older adult with dysphagia, dysarthria, and hand weakness; upper and lower motor neuron signs on examination; evidence of lower motor neuron involvement on EMG                           | No                         | Amyotrophic lateral sclerosis             | No trial                    | No                                                                                                        | 68.3 | -    |
| 18 | Older adult with insidious amnesic syndrome; hippocampal atrophy on MRI                                                                                                                   | Yes (Cognitive Impairment) | Alzheimer's disease                       | No trial                    | Yes, T1DM                                                                                                 | 192  | -    |
| 19 | Middle-aged adult with insidious sensory symptoms in legs; length-dependent, axonal, predominantly sensory neuropathy on NCS/EMG; mother has idiopathic peripheral neuropathy             | No                         | Inherited neuropathy                      | No trial                    | Yes, thyroid disease                                                                                      | 137  | -    |
| 20 | Child with five generalized tonic-clonic seizures in the setting of hypocalcemia                                                                                                          | Yes (Epilepsy)             | Provoked seizures due to hypocalcemia     | No trial                    | Yes, autoimmune polyglandular syndrome type 1 (hypothyroidism, hypoparathyroidism, adrenal insufficiency) | 28.2 | -    |
| 21 | Middle-aged adult with insidious amnesic syndrome; parietal lobe hypometabolism on PET scan                                                                                               | Yes (Cognitive Impairment) | Alzheimer's disease                       | No, trialed corticosteroids | Yes, thyroid disease, pernicious anemia                                                                   | 168  | 0.37 |
| 22 | Middle-aged adult with insidious sensory loss with insensitivity to pain, length-dependent sensorimotor peripheral neuropathy with mixed axonal and demyelinating features on NCS/EMG     | No                         | Inherited neuropathy                      | No trial                    | No                                                                                                        | 388  | -    |
| 23 | Middle-aged adult with gait difficulty followed by urinary urgency, dysarthria, antecollis and myoclonus; parkinsonism on examination; T2-hyperintensity of posterolateral putamen on MRI | No                         | Multiple system atrophy-parkinsonian type | No trial                    | No                                                                                                        | 43.2 | -    |
| 24 | Older adult with insidious amnesic syndrome;                                                                                                                                              | Yes (Cognitive Impairment) | Alzheimer's disease                       | No, trialed IVIG            | Yes, T1DM                                                                                                 | 95.5 | -    |

|    |                                                                                                                                                                                                                 |                              |                                                                                                 |                                                 |                             |      |      |
|----|-----------------------------------------------------------------------------------------------------------------------------------------------------------------------------------------------------------------|------------------------------|-------------------------------------------------------------------------------------------------|-------------------------------------------------|-----------------------------|------|------|
|    | frontotemporal more than parietal hypometabolism on PET scan                                                                                                                                                    |                              |                                                                                                 |                                                 |                             |      |      |
| 25 | Middle-aged adult with insidiously progressive gait difficulties; findings of length-dependent peripheral neuropathy without cerebellar signs on examination; outside NCS/EMG documenting peripheral neuropathy | Yes (Cerebellar Ataxia)      | Diabetic peripheral neuropathy                                                                  | No trial                                        | Yes, T1DM, thyroid disease  | 24.1 | -    |
| 26 | Middle-aged adult with episodic gait unsteadiness correlating to timing of carbamazepine dose; negative genetic testing for episodic ataxia; history of epilepsy secondary to traumatic brain injury            | Yes (Cerebellar Ataxia)      | Side effect of carbamazepine; recommended switching to levetiracetam but no follow-up available | No, trialed corticosteroids                     | No                          | 198  | -    |
| 27 | Older adult with insidious mild amnesic syndrome and subjective feeling of weakness; partial improvement after treatment of B12 deficiency                                                                      | Yes (Cognitive Impairment)   | Alzheimer's disease, B12 deficiency                                                             | No trial                                        | Pernicious anemia, vitiligo | 51.7 | 0.19 |
| 28 | Older adult with insidious leg weakness/spasms; upper motor neuron signs in legs on examination; electrophysiologic evidence of motor neuron disease in cervical, thoracic and lumbar segments on NCS/EMG       | Yes (SPSD/Myelopathy)        | Amyotrophic lateral sclerosis                                                                   | No trial                                        | Yes, T1DM                   | 38.7 | -    |
| 29 | Young adult with insidious difficulty walking and low back/leg stiffness/spasms; evidence of myotonia on EMG; pathogenic mutation in CLCN1 gene                                                                 | Yes (SPSD)                   | Becker's myotonia                                                                               | Yes, improved with corticosteroids <sup>3</sup> | Yes, thyroid disease        | 33   | 1.1  |
| 30 | Middle-aged adult with ataxic dysarthria, left-sided ataxia/dystonia and stiffness of left leg; ATP1A3 mutation of uncertain clinical significance; brother with atypical parkinsonism                          | Yes (Cerebellar Ataxia/SPSD) | ATP1A3-associated neurological disease                                                          | No, trialed IVIG and corticosteroids            | Yes, T1DM                   | 889  | 3.72 |
| 31 | Older adult with insidious cognitive decline with rapid worsening after heart surgery;                                                                                                                          | Yes (Cognitive Impairment)   | Dementia with Lewy bodies                                                                       | No, trialed corticosteroids                     | No                          | 123  | 0.82 |

|    |                                                                                                                                                                                                              |                            |                                                                                         |                                                                         |                                      |      |   |
|----|--------------------------------------------------------------------------------------------------------------------------------------------------------------------------------------------------------------|----------------------------|-----------------------------------------------------------------------------------------|-------------------------------------------------------------------------|--------------------------------------|------|---|
|    | fluctuations in attention; history of dream enactment behavior in sleep; parkinsonism on examination                                                                                                         |                            |                                                                                         |                                                                         |                                      |      |   |
| 32 | Young adult with limping related to leg pain; equivocally increased tone in legs but overall “quite normal” neurological examination                                                                         | Yes (SPSD/Myelopathy)      | Myofascial pain syndrome                                                                | No trial                                                                | Yes, T1DM, pernicious anemia         | 23.6 | - |
| 33 | Adolescent with new-onset psychosis, delusions, disorganized thoughts, and insomnia with impaired memory/concentration, followed by catatonia; mild dysmorphism; chromosome 22q11.1 microdeletion identified | Yes (Cognitive Impairment) | Primary psychotic disorder (reported higher risk with chromosome 22q11.1 microdeletion) | No, trialed steroids and IVIG                                           | No                                   | 28.1 | - |
| 34 | Adolescent with episodic vertigo and gait unsteadiness with headache 50% of the time; triggers reported include certain foods, bright lights, loud sounds, and foul odors                                    | Yes (Cerebellar Ataxia)    | Vestibular migraine                                                                     | No trial                                                                | Yes, T1DM                            | 53.4 | - |
| 35 | Child with episodes of mouth-opening, head tilt and breath-holding with preserved awareness in patient with developmental delay and hand-wringing; no abnormality on EEG during episodes                     | Yes (Epilepsy)             | Primary complex motor stereotypy                                                        | No trial                                                                | No                                   | 1514 | - |
| 36 | Older adult with insidious difficulty walking long distances; mild parkinsonism on examination; decreased striatal dopamine transporter density on DaTscan                                                   | No                         | Idiopathic Parkinson’s disease                                                          | No trial                                                                | Yes, thyroid disease                 | 33.1 | - |
| 37 | Young adult with Trisomy 21, visual and auditory hallucinations                                                                                                                                              | No                         | Primary psychotic disorder                                                              | No, trialed corticosteroids, IVIG and rituximab                         | Yes, thyroid disease, celiac disease | 35.4 | - |
| 38 | Middle-aged adult with mild cognitive complaints (less efficient at work, some forgetfulness); essentially normal neuropsychometric                                                                          | Yes (Cognitive Impairment) | Depression/Anxiety                                                                      | No, only non-sustained subjective benefit with corticosteroids and IVIG | Yes, thyroid disease                 | 364  | - |

|    |                                                                                                                                                                                                                                 |                                    |                                                      |          |                                         |      |   |
|----|---------------------------------------------------------------------------------------------------------------------------------------------------------------------------------------------------------------------------------|------------------------------------|------------------------------------------------------|----------|-----------------------------------------|------|---|
|    | testing aside from concern for clinical depression/anxiety                                                                                                                                                                      |                                    |                                                      |          |                                         |      |   |
| 39 | Older adult with chronic right-sided facial pain, exacerbated by changes in barometric pressure and radiating right occipital pain; right occipital notch tenderness on examination                                             | No                                 | Chronic migraine, occipital neuralgia                | No trial | No                                      | 459  | - |
| 40 | Older adult with insidious sensory loss in feet and imbalance; mild findings of sensory neuropathy in feet on examination stable over years; length-dependent small-fiber neuropathy on TST                                     | No                                 | Idiopathic length-dependent small fiber neuropathy   | No trial | No                                      | 258  | - |
| 41 | Older adult with insidious cognitive decline, bilateral posterior temporal and parietal hypometabolism on PET scan                                                                                                              | Yes (Cognitive Impairment)         | Alzheimer's disease                                  | No trial | No                                      | 161  | - |
| 42 | Middle-aged adult with insidious leg weakness and gait difficulties; spastic quadriparesis with impaired vibration/proprioception in legs on examination                                                                        | Yes (Cerebellar Ataxia/Myelopathy) | Subacute combined degeneration due to B12 deficiency | No trial | Yes, pernicious anemia                  | 470  | - |
| 43 | Middle-aged adult with chronic hypersensitivity to touch in feet and intermittent painful color change in toes and fingers; high arches, hammertoes and allodynia in feet on examination                                        | No                                 | Inherited neuropathy, Raynaud's phenomenon           | No trial | No                                      | 237  | - |
| 44 | Middle-aged adult with episodic paralysis lasting hours but preserved consciousness and ability to swallow; episodes provoked by anxious situations; normal ictal serum potassium; no findings of periodic paralysis on NCS/EMG | No                                 | Functional neurological disorder                     | No trial | No                                      | 461  | - |
| 45 | Middle-aged adult with longstanding depression with psychotic features; presented to hospital with impaired attention/concentration/anxiety in context of multiple psychosocial stressors; resolved                             | Yes (Cognitive Impairment)         | Exacerbation of known psychiatric disease            | No trial | Yes, thyroid disease, pernicious anemia | 45.3 | - |

|    |                                                                                                                                                                                                                       |                            |                                                         |                                                   |                                         |      |      |
|----|-----------------------------------------------------------------------------------------------------------------------------------------------------------------------------------------------------------------------|----------------------------|---------------------------------------------------------|---------------------------------------------------|-----------------------------------------|------|------|
|    | in hospital with nutrition and hydration                                                                                                                                                                              |                            |                                                         |                                                   |                                         |      |      |
| 46 | Middle-aged adult with chronic leg muscle cramps; normal neurological examination aside from witnessed cramp in foot; cramps resolved with gabapentin                                                                 | No                         | Muscle cramps                                           | No trial                                          | Yes, pernicious anemia                  | 219  | -    |
| 47 | Young adult with chronic fatigue, poor sleep and orthostatic lightheadedness after numerous stressful life events; clinical concern for depression; normal neurological examination                                   | No                         | Orthostatic intolerance, Somatic symptoms of depression | No trial                                          | No                                      | 29.2 | 0.14 |
| 48 | Young adult with chronic sensory symptoms in feet and hands; glove-and-stocking distribution sensory loss on examination; evidence of chronic length-dependent axonal peripheral neuropathy on EMG                    | No                         | Idiopathic length-dependent large fiber neuropathy      | No trial                                          | No                                      | 30.7 | -    |
| 49 | Young adult with chronic diffuse upper body pain and reported stiffness; variably stiff posturing but no objective stiffness, spasms or paraspinal hypertrophy on examination; diffuse tenderness                     | Yes (SPSD)                 | Fibromyalgia                                            | No, trialed IVIG with only non-sustained response | Yes, T1DM                               | 39.6 | -    |
| 50 | Middle-aged adult with headache, poor concentration, dizziness and difficulty sleeping after head injury                                                                                                              | Yes (Cognitive Impairment) | Post-concussive syndrome                                | No trial                                          | Yes, T1DM                               | 434  | -    |
| 51 | Older adult with memory complaints and feeling of exhaustion in context of B12 deficiency, anemia, hypothyroidism and worsening depression; partial improvement with B12 supplementation                              | Yes (Cognitive Impairment) | B12 Deficiency, Depression                              | No trial                                          | Yes, thyroid disease, pernicious anemia | 348  | -    |
| 52 | Middle-aged adult with chronic intermittent paresthesias of the hands and feet that improve with movement, feeling of hand "swelling", sense of imbalance, and heat intolerance; only equivocal sensory loss in hands | No                         | Chronic idiopathic anhidrosis                           | No trial                                          | No                                      | 1377 | -    |

|    |                                                                                                                                                                                                                                                                                                                                                                                        |                            |                                                                                                 |                                                                 |                                                   |      |      |
|----|----------------------------------------------------------------------------------------------------------------------------------------------------------------------------------------------------------------------------------------------------------------------------------------------------------------------------------------------------------------------------------------|----------------------------|-------------------------------------------------------------------------------------------------|-----------------------------------------------------------------|---------------------------------------------------|------|------|
|    | and feet on examination; diffuse anhidrosis sparing hands on TST; normal NCS/EMG                                                                                                                                                                                                                                                                                                       |                            |                                                                                                 |                                                                 |                                                   |      |      |
| 53 | Young adult with tremulousness, spasms and internal feeling of vibration after starting ziprasidone for bipolar disorder; normal neurological examination                                                                                                                                                                                                                              | Yes (SPSD)                 | Side effect of ziprasidone, recommended discontinuation                                         | No trial                                                        | Yes, T1DM                                         | 149  | 0.32 |
| 54 | Young adult with intermittent stuttering of speech, feeling of head heaviness and cognitive difficulties; variable stuttering but otherwise normal neurological examination                                                                                                                                                                                                            | Yes (Cognitive Impairment) | Functional neurological disorder                                                                | No trial                                                        | Yes, thyroid disease                              | 31.5 | -    |
| 55 | Middle-aged adult with insidious numbness and tingling in hands and feet, stable for last year; findings of both mild length-dependent sensory loss and right-sided spasticity/hyperreflexia on examination; mild axonal sensorimotor peripheral neuropathy and C5/C6 radiculopathies on NCS/EMG; severe cervical spinal and foraminal stenosis due to degenerative spondylosis on MRI | Yes (Myelopathy)           | Compressive myelopathy/radiculopathy, Diabetic peripheral neuropathy                            | No trial                                                        | No (has type 2 diabetes mellitus)                 | 69.3 | -    |
| 56 | Middle-aged adult with chronic feeling of low energy, body aches, stiffness, "brain fog", and postural lightheadedness/dizziness dating back to childhood; episodic kicking/flailing of legs elicited by medication injection                                                                                                                                                          | Yes (SPSD)                 | Postural orthostatic tachycardia syndrome, Functional neurological disorder                     | No, trialed IVIG and then SCIG with only non-sustained response | No                                                | 216  | -    |
| 57 | Middle-aged adult with remote upper extremity paresthesias and more recently weakness; mild neck flexor and proximal upper extremity weakness/hyporeflexia and lower extremity hyperreflexia on examination; motor neuron                                                                                                                                                              | Yes (Myelopathy)           | Subacute combined degeneration, followed by bibrachial amyotrophic diplegia (limited follow-up) | No trial                                                        | Yes, thyroid disease, pernicious anemia, vitiligo | 322  | 1.14 |



|                                    |                                                                                                                                                                                                                                                                                                                                                         |                         |                                            |                                                |                      |      |      |
|------------------------------------|---------------------------------------------------------------------------------------------------------------------------------------------------------------------------------------------------------------------------------------------------------------------------------------------------------------------------------------------------------|-------------------------|--------------------------------------------|------------------------------------------------|----------------------|------|------|
|                                    | process affecting cervical segments on NCS/EMG; cervical cord atrophy and equivocal posterior column T2-hyperintensity on MRI; previously treated B12 deficiency                                                                                                                                                                                        |                         |                                            |                                                |                      |      |      |
| 58                                 | Young adult with dysarthria, dysphagia, hand weakness and right-sided stiffness developing over one year; flaccid dysarthria, right arm weakness and spasticity in all limbs on examination; evidence of diffuse motor neuron process on NCS/EMG                                                                                                        | No                      | Amyotrophic lateral sclerosis              | No, trialed IVIG                               | No                   | 45.8 | -    |
| 59                                 | Middle-aged adult with limb weakness, slurred speech, dysphagia and involuntary laughing/crying developed over ten years (more rapidly over three years); spastic dysarthria, mild proximal right arm and lower extremity weakness with brisk reflexes and scattered fasciculations on examination; evidence of diffuse motor neuron process on NCS/EMG | No                      | Amyotrophic lateral sclerosis              | No, trialed steroids and IVIG                  | Yes, thyroid disease | 284  | 0.49 |
| <i>Neuroinflammatory diagnoses</i> |                                                                                                                                                                                                                                                                                                                                                         |                         |                                            |                                                |                      |      |      |
| 60                                 | Middle-aged adult with insidious gait difficulties, leg weakness and numbness, right arm tremor; previous episodes of double vision and history of right eye blurring; distractible tremor, "astasia abasia" and give-way weakness on examination; lesions typical of demyelination on MRI                                                              | Yes (Cerebellar Ataxia) | Multiple sclerosis with functional overlay | No trial                                       | No                   | 82.8 | -    |
| 61                                 | Young adult with progressive gait imbalance, blurred vision, intermittent diplopia; optic disc pallor, cerebellar signs and left leg weakness on examination;                                                                                                                                                                                           | Yes (Cerebellar Ataxia) | Multiple sclerosis                         | Yes, stabilized/mildly improved with rituximab | No                   | 72.5 | -    |

|    |                                                                                                                                                                                                                                                                                                                 |                             |                    |                                                                                    |                                         |      |   |
|----|-----------------------------------------------------------------------------------------------------------------------------------------------------------------------------------------------------------------------------------------------------------------------------------------------------------------|-----------------------------|--------------------|------------------------------------------------------------------------------------|-----------------------------------------|------|---|
|    | extensive lesions typical of demyelination on MRI                                                                                                                                                                                                                                                               |                             |                    |                                                                                    |                                         |      |   |
| 62 | Middle-aged adult with episode of limb dysesthesias and abdominal tightness, and right followed by left eye vision loss; right optic nerve swelling and left optic nerve pallor on examination; several lesions concerning for demyelination on MRI                                                             | Yes (Myelopathy)            | Multiple sclerosis | Yes, improved with corticosteroids                                                 | Yes, thyroid disease                    | 23.9 | - |
| 63 | Older adult with persistent mild bilateral leg numbness/heaviness for two years; previous episodes of vision loss, numbness and facial weakness; lesions in cervical cord concerning for demyelination on MRI                                                                                                   | Yes (Myelopathy)            | Multiple sclerosis | No trial                                                                           | Yes, thyroid disease, pernicious anemia | 25.1 | - |
| 64 | Middle-aged adult with fluctuating ptosis and diplopia, followed by jaw weakness with chewing; left ptosis, ophthalmoparesis, facial weakness, subtle flaccid dysarthria and mild deltoid weakness on examination; abnormal jitter on NCS/EMG; positive acetylcholine receptor antibodies; no thymoma diagnosed | Yes (Brainstem Dysfunction) | Myasthenia gravis  | No, trialed IVIG with only non-sustained response and limited follow-up thereafter | No                                      | 419  | - |
| 65 | Older adult with neck weakness, followed by dysarthria and dysphagia; bilateral ptosis with sustained upgaze, bifacial weakness and neck extensor weakness on examination; abnormal jitter on NCS/EMG; positive acetylcholine receptor antibodies; no thymoma diagnosed                                         | Yes (Brainstem Dysfunction) | Myasthenia gravis  | Yes, improved with IVIG and mycophenolate                                          | Yes, thyroid disease                    | 434  | - |
| 66 | Middle-aged adult with new-onset difficulty chewing and dysphagia, followed by fluctuating ptosis and transient diplopia; positive acetylcholine                                                                                                                                                                | Yes (Brainstem Dysfunction) | Myasthenia gravis  | Yes, improved with IVIG                                                            | Yes, thyroid disease                    | 251  | - |

|    |                                                                                                                                                                                                           |                                     |                                                                                                          |                                    |                                             |      |      |
|----|-----------------------------------------------------------------------------------------------------------------------------------------------------------------------------------------------------------|-------------------------------------|----------------------------------------------------------------------------------------------------------|------------------------------------|---------------------------------------------|------|------|
|    | receptor antibodies; thymoma diagnosed                                                                                                                                                                    |                                     |                                                                                                          |                                    |                                             |      |      |
| 67 | Older adult with subacute proximal muscle weakness and slurred speech; evidence of myopathy on NCS/EMG; inflammatory myopathy on muscle biopsy; thymoma diagnosed                                         | No                                  | Paraneoplastic myositis                                                                                  | Yes, improved with corticosteroids | No                                          | 42.7 | -    |
| 68 | Middle-aged adult with difficulty walking; lower extremity weakness, upper motor neuron signs, gait and limb ataxia on examination; clinical history of relapses; lesions typical of demyelination on MRI | Yes (Cerebellar Ataxia/Myelopathy)  | Multiple sclerosis                                                                                       | No trial                           | Yes, T1DM                                   | 136  | -    |
| 69 | Older adult with new-onset dysphagia followed by respiratory failure; evidence of neuromuscular junction defect on outside NCS/EMG; positive acetylcholine receptor antibodies; no thymoma diagnosed      | Yes (Brainstem Dysfunction)         | Myasthenia gravis                                                                                        | Yes, improved with IVIG and PLEX   | No                                          | 260  | -    |
| 70 | Young adult with transverse myelitis and recurrent optic neuritis; MOG-IgG positive by live cell-based assay                                                                                              | Yes (Myelopathy)                    | MOG-IgG-associated disease                                                                               | Yes, improved with corticosteroids | Yes, thyroid disease, pernicious anemia     | 2068 | 16.1 |
| 71 | Middle-aged adult with cognitive impairment and seizures following allogeneic stem cell transplant, nodular dural enhancement with multifocal lesions on MRI                                              | Yes (Epilepsy/Cognitive Impairment) | Central nervous system graft-versus-host disease with documented ocular and gastrointestinal involvement | Yes, improved with corticosteroids | Yes, thyroid disease, adrenal insufficiency | 3108 | 154  |

<sup>1</sup>Systemic autoimmunity refers to presence of T1DM, thyroid disease, pernicious anemia, adrenal insufficiency, vitiligo or celiac disease.

<sup>2</sup>Improvement in temporal relationship to rituximab administration may have been natural history of disease, as ATP1A3-associated neurological disease may present with subacute episodes of neurological decline following infection with spontaneous recovery.

<sup>3</sup>Improvement in temporal relationship to steroids may have been related to baclofen and carbamazepine, which were started at the same time.

Age stratification is as follows: child, less than 12 years of age; adolescent, 13-18 years of age; young adult, 19-45 years of age; middle-aged adult, 46-65 years of age; older adult, greater than 65 years of age.

ATP1A3 = ATPase Na<sup>+</sup>/K<sup>+</sup> transporting subunit alpha 3; CLCN1 = chloride voltage-gated channel ; CSF = cerebrospinal fluid; DaTscan = dopamine transporter (DAT) single photon emission computerized tomography; EEG = electroencephalography; NCS/EMG = nerve conduction studies/electromyography; GAD65 = glutamic acid decarboxylase-65;

IVIG = intravenous immunoglobulin; LE = limbic encephalitis; MOG = myelin oligodendrocyte glycoprotein; MRI = magnetic resonance imaging; PET = positron emission tomography; PLEX = plasma exchange; PPPD = persistent postural-perceptual dizziness; SCIG = subcutaneous immunoglobulin; SPSD = stiff-person spectrum disorders; T1DM = type 1 diabetes mellitus; TST = thermoregulatory sweat test
